# Supplementary material for: Assessment of the key regulatory genes and their Interologs for Turner Syndrome employing network approach
Source: PubMed Central journal article supplement (PMC6031616; doi:10.1038/s41598-018-28375-0), 2018-07-04
Supplement: 41598_2018_28375_MOESM1_ESM.pdf [file 41598_2018_28375_MOESM1_ESM.pdf]

## **Assessment of the key regulatory genes and their Interologs for Turner Syndrome employing network approach**

Anam Farooqui<sup>1</sup>, Safia Tazyeen<sup>1</sup>, Mohd. Murshad Ahmed<sup>1</sup>, Aftab Alam<sup>1</sup>, Shahnawaz Ali<sup>1</sup>, Md. Zubair Malik<sup>1</sup>, Sher Ali<sup>1</sup> and Romana Ishrat<sup>1\*</sup>

<sup>1</sup>Centre for Interdisciplinary Research in Basic Sciences, Jamia Millia Islamia, New Delhi-110025, India

\*Corresponding Author:

Dr Romana Ishrat (Assistant Professor)

Centre for Interdisciplinary Research in Basic Sciences,

Jamia Millia Islamia, New Delhi-110025, India.

Email address – [romana05@gmail.com](mailto:romana05@gmail.com)

Table S1. List of top 120 Proteins identified by centrality-based method in TS network

| S.N. | Protein Name<br>(Degree Distribution) | Protein Name<br>(Betweenness Centrality) | Protein Name<br>(Closeness Centrality) | Protein Name<br>(Eigen Value) |
|------|---------------------------------------|------------------------------------------|----------------------------------------|-------------------------------|
| 1    | HSP7C                                 | EP300                                    | Polyubiquitin-C                        | EF1A1                         |
| 2    | EF1A1                                 | CALM                                     | EP300                                  | YBOX1                         |
| 3    | CALM                                  | ANDR                                     | ANDR                                   | GEMI4                         |
| 4    | YBOX1                                 | SMAD2                                    | SMAD2                                  | MPCP                          |
| 5    | Polyubiquitin-C                       | JAK2                                     | CALM                                   | FILA2                         |
| 6    | MPCP                                  | SMAD4                                    | SMAD4                                  | GEMI2                         |
| 7    | GEMI4                                 | HSP7C                                    | ESR1                                   | CALM                          |
| 8    | EP300                                 | HDAC3                                    | HSP7C                                  | FLNA                          |
| 9    | TBA4A                                 | CTNB1                                    | HDAC3                                  | TBA4A                         |
| 10   | ALBU                                  | Polyubiquitin-C                          | HS90A                                  | HSPB1                         |
| 11   | DCD                                   | PTN1                                     | YBOX1                                  | RO52                          |
| 12   | IGHG1                                 | INSR                                     | EF1A1                                  | SERPH                         |
| 13   | FLNA                                  | TGFR2                                    | MYC                                    | ANXA2                         |
| 14   | GEMI2                                 | XIAP                                     | CTNB1                                  | HSP7C                         |
| 15   | FILA2                                 | TGFR1                                    | NCOR1                                  | IGHG1                         |
| 16   | ACTB                                  | HS90A                                    | P53                                    | DCD                           |
| 17   | SMAD4                                 | VDR                                      | MAX                                    | ALBU                          |
| 18   | HSPB1                                 | NCOA3                                    | RUNX1                                  | MYH9                          |
| 19   | G3P                                   | NHRF2                                    | PRKDC                                  | ACTB                          |
| 20   | MYH9                                  | EF1A1                                    | IF2B3                                  | G3P                           |
| 21   | RS3                                   | IGF1R                                    | INSR                                   | ATPA                          |
| 22   | ANXA2                                 | Mitogen-activated<br>protein kinase 11   | FLNA                                   | HS90A                         |
| 23   | SERPH                                 | SRC                                      | TGFR1                                  | Polyubiquitin-C               |
| 24   | RO52                                  | ESR1                                     | Nucleophosmin                          | RL13                          |
| 25   | SMAD2                                 | PTN11                                    | JAK2                                   | IF2B3                         |
| 26   | ATPA                                  | T-DHT/AR                                 | PTN11                                  | 40S ribosomal<br>protein S4   |
| 27   | IF2B3                                 | Adapter protein GRB2                     | PELP1                                  | RS3                           |
| 28   | RL13                                  | ZFYV9                                    | Histone H4                             | EP300                         |
| 29   | 40S ribosomal<br>protein<br>S4        | CTND1                                    | NCOA3                                  | SMAD2                         |
| 30   | HS90A                                 | NCOR1                                    | MBB1A                                  | SMAD4                         |

Table S2. Orthologous proteins of *C. elegans*, *F. catus* and *M. mulatta*

| Protein Name | Orthologous Protein/Gene |                   |                 |
|--------------|--------------------------|-------------------|-----------------|
|              | <i>H. sapiens</i>        | <i>C. elegans</i> | <i>F. catus</i> |
| SRY          | SOX-3                    | SRY               | SRY             |
| HDAC3        | HDA-3                    | HDAC3             | HDAC3           |
| RPS4Y1       | -                        | -                 | RPS4Y1          |
| RPS3         | RPS4                     | RPS3              | RPS3            |
| KDM6A        | UTX-1                    | KDM6A             | KDM6A           |
| WDR5         | WDR-5.1                  | WDR5              | WDR5            |
| ASH2L        | ASH-2                    | ASH2L             | ASH2L           |
| BDNF         | -                        | BDNF              | BDNF            |
| MBPT1        | -                        | MBTPS1            | MBTPS1          |
| CAPS2        | UNC-31                   | CADPS2            | CADPS2          |
| CBPE         | EGL-21                   | CPE               | -               |
| NOS3         | R05G6.4                  | NOS3              | NOS3            |
